# Supplementary material
Source: PubMed Central journal article supplement (PMC1194899)

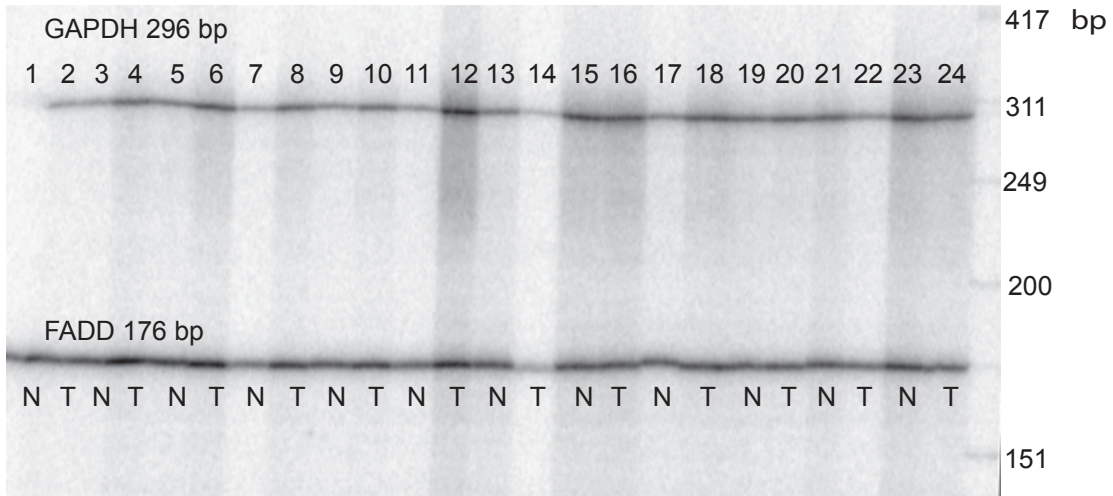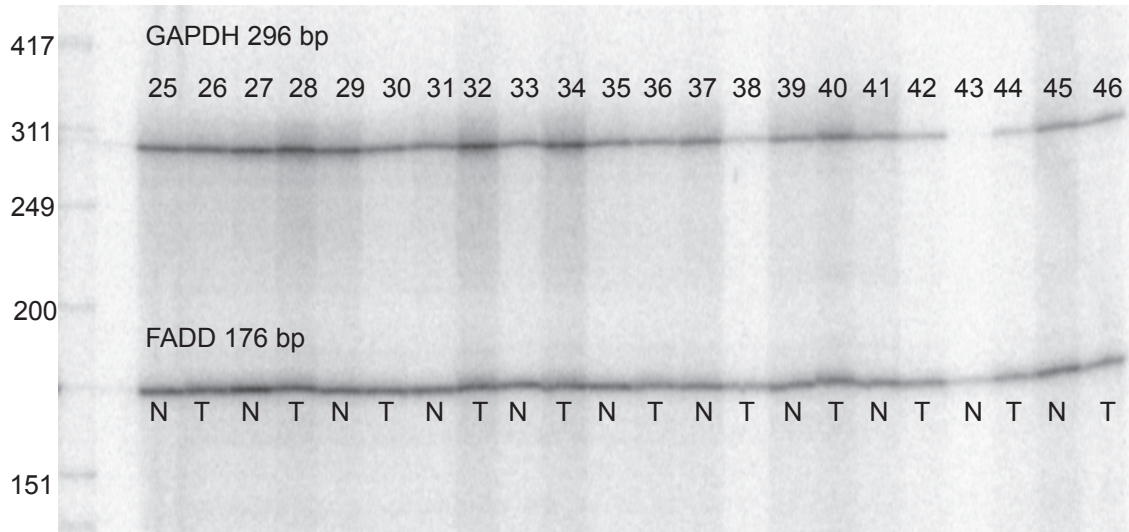

Supplement: pnas_0500397102_1.pdf [file pnas_0500397102_1.pdf]
